# Supplementary material for: Association between the Persistence of Obesity and the Risk of Gastric Cancer: A Nationwide Population-Based Study
Source: PubMed Central journal article supplement — Cancer Res Treat. 2021 May 4;54(1):199–207. doi: 10.4143/crt.2021.130 (PMC8756136; doi:10.4143/crt.2021.130), 2021-05-04
Supplement: crt-2021-130_S1_Table.pdf [file crt-2021-130_S1_Table.pdf]

**S1 Table.** Baseline characteristics of those who with unknown BMI

|                          | Unknown BMI<br>(n=5,058) |
|--------------------------|--------------------------|
| Age (yr)                 | 39.6±9.4                 |
| 20-39                    | 2,943 (58.2)             |
| 40-64                    | 2,065 (40.8)             |
| ≥ 65                     | 50 (1.0)                 |
| Male sex                 | 4,396 (86.9)             |
| WC (cm)                  | 87.3±13.3                |
| Rural residence          | 3,588 (70.9)             |
| Low income <sup>a)</sup> | 623 (12.3)               |
| Smoking                  |                          |
| Never                    | 1,925 (38.1)             |
| Former                   | 977 (19.3)               |
| Current                  | 2,156 (42.6)             |
| Alcohol                  |                          |
| None                     | 1,724 (34.1)             |
| Mild <sup>b)</sup>       | 2,800 (55.4)             |
| Heavy <sup>c)</sup>      | 534 (10.6)               |
| Regular exercise         | 3,331 (65.9)             |
| Diabetes                 | 505 (10.0)               |
| Hypertension             | 1,350 (26.7)             |
| Dyslipidemia             | 963 (19.0)               |

Values are presented as mean±SD or number (percentage excluding missing data). BMI, body mass index; WC, waist circumference. <sup>a)</sup>The lowest quartile range of yearly income of those under National Health Insurance Service and the income of those under Medical Aid which is for the recipients of National Basic Livelihood Security Program, <sup>b)</sup>Alcohol consumption < 30 g/day, <sup>c)</sup>Alcohol consumption ≥ 30 g/day.
